# Supplementary material for: Facile synthesis of MnO/NC nanohybrids toward high-efficiency ORR for zinc–air battery
Source: Royal Society of Chemistry journal article supplement (doi:10.1039/d4ra04237a), 2024-01-01
Supplement: d4ra04237a1.pdf [file d4ra04237a1.pdf]

## Supporting information

### Facile synthesis of MnO/NC nanohybrids toward high-efficiency ORR for zinc-air battery

Qingxi Zhuang,<sup>§a</sup> Chengjun Hu,<sup>§a</sup> Weiting Zhu,<sup>a</sup> Gao Cheng,<sup>\*a</sup> Meijie Chen,<sup>a</sup> Ziyuan Wang,<sup>b</sup> Shijing Cai,<sup>b</sup> Litu Li,<sup>a</sup> Zier Jin,<sup>\*b</sup> and Qiang Wang <sup>\*c</sup>

<sup>a</sup> School of Chemical Engineering and Light Industry, Guangdong University of Technology, Guangzhou 510006, China.

<sup>b</sup> Foshan Institute of Environment and Energy Technology, Foshan 528000, China.

<sup>c</sup> School of Materials and Energy, Chongqing Key Laboratory for Advanced Materials and Technologies of Clean Energies, Southwest University, Chongqing 400715, China.

<sup>§</sup> These authors contributed equally to this work.

<sup>\*</sup> Corresponding author.

E-mail address: chengg36@gdut.edu.cn; fiect0325@163.com; wysnu@swu.edu.cn

## Experimental

### *Characterizations*

The crystal structures of products were analyzed by X-ray diffraction (XRD, Aeris), utilizing Cu-K $\alpha$  radiation with an applied voltage of 15 kV and an electrical current of 40 mA, across a  $2\theta$  range of 10~80°. Raman spectra were recorded using a 532-nanometre laser on a Raman spectrometer (LabRAM HR Evolution). The morphologies and microstructures of as-prepared samples were studied by field emission scanning electron microscopy (FESEM, SU8220) at a 15 kV accelerating voltage and field emission scanning electron microscopy (FETEM, Tecnai G2F30) at a 300 kV accelerating voltage. The elemental compositions and their contents and surface bonding states were characterized by X-ray photoelectron spectroscopy (XPS, Escalab 250 XI). The monochromatic radiation energy of Al K $\alpha$  was set at 1486.6 eV. The measured spectrum was corrected for the amorphous carbon peak (C 1s) at 284.8 eV.

### *Electrochemical measurements*

Electrochemical measurements were performed using a CHI 760E electrochemical workstation equipped with a standard three-electrode electrochemical cell. Rotating disk electrode (RDE)/rotating ring disk electrode (RRDE), Ag/AgCl electrode (3.5 M KCl), and graphite rod were used as working electrode, reference electrode, and counter electrode, respectively. The catalyst ink was prepared as follows: 7.5 mg of catalyst was added to a solution containing 950  $\mu$ L ethanol and 50  $\mu$ L Nafion, and the mixed solution was then treated by sonication for 1 h. The homogeneous ink was dropped onto the RDE/RRDE for electrochemical tests. The mass loading on the RDE/RRDE was  $\sim 0.27$  mg cm $^{-2}$ . All potentials in this study were converted to reversible hydrogen electrode (RHE) using the equation:  $E_{RHE} = E_{Ag/AgCl} + 0.059 \times pH + 0.2046$ , where  $E_{Ag/AgCl}$  is the measured potential vs. Ag/AgCl electrode. Cyclic voltammetry (CV) was performed in O $_2$ -saturated 0.1 M KOH at a scan rate of 50 mV/s. And linear sweep voltammetry (LSV) was tested in

O<sub>2</sub>-saturated 0.1 M KOH at a scan rate of 5 mV/s.

For the Tafel slope, kinetic current density ( $J_K$ ) is corrected through the diffusion current density ( $J_L$ ) from the Koutecky-Levich (K-L) equation (1):

$$J_K = \frac{J_L \times J}{J_L - J} \quad (1)$$

K-L plots ( $J^{-1}$  vs.  $\omega^{-1/2}$ ) are obtained at different potentials and fitted to linear curves using the following K-L equation (2) to calculate the number of electrons transferred ( $n$ ):

$$\frac{1}{J} = \frac{1}{J_L} + \frac{1}{J_k} = \frac{1}{B\omega^{1/2}} + \frac{1}{J_k} \quad (2)$$

where  $\omega$  is the rotating rate.  $B$  is determined from the slope of K-L plots based on equation (3):

$$B = 0.62nFC_0(D_0)^{2/3}\nu^{-1/6} \quad (3)$$

where  $F$  is the Faraday constant (96485 C mol<sup>-1</sup>),  $n$  is the number of electrons transferred per molecule of oxygen,  $C_0$  is the bulk concentration of O<sub>2</sub> (1.2 × 10<sup>-6</sup> mol cm<sup>-3</sup>),  $D_0$  is the diffusion of diffusion of O<sub>2</sub> (1.9 × 10<sup>-5</sup> cm<sup>2</sup> s<sup>-1</sup>), and  $\nu$  is the kinetic viscosity of the electrolyte (0.01 cm<sup>2</sup> s<sup>-1</sup>)

Electron transfer number ( $n$ ) and H<sub>2</sub>O<sub>2</sub> yield were tested using RRDE and calculated using the following equations (4) and (5):

$$H_2O_2 \text{ yield} = 200 \times \frac{J_R/N}{J_D + J_R/N} \quad (4)$$

$$n = \frac{4 \times J_D}{J_D + J_R/N} \quad (5)$$

where  $J_D$  and  $J_R$  are the disc and ring current densities, respectively, and  $N$  (0.37, using [Fe(CN)]<sup>3-</sup>/[Fe(CN)<sub>6</sub>]<sup>4-</sup> redox couple) is the collection efficiency of Pt ring.

Double-layer capacitance ( $C_{dl}$ ) was calculated from cyclic voltammetry at different scan rates in the non-Faradic region (1.07~1.22 V).  $C_{dl}$  value is derived from the following equation (6):

$$C_{dl} = \frac{|j_a - j_c|}{2d(v_b)} \quad (6)$$

$v_b$  = scan rate variance,  $j_a - j_c$  = the change in current density.

ECSA value is derived from the following equation (7):

$$ECSA = \frac{C_{dl}}{C_s} \quad (7)$$

$C_s$  is the specific capacitance of the as-synthesized sample.

#### *Aqueous Zinc-air battery assembly and test*

The aqueous ZAB performance was measured on an electrochemical workstation (CHI 760E) and a battery testing system (LAND, CT3001A 1U). The dried catalyst with a loading of  $\sim 1.00 \text{ mg cm}^{-2}$  was uniformly coated on the stainless steel mesh as an air electrode. A polished zinc plate was used as the negative electrode, and the electrolyte consisted of KOH (6 M) and  $\text{Zn}(\text{CH}_3\text{COO})_2$  (0.2 M).

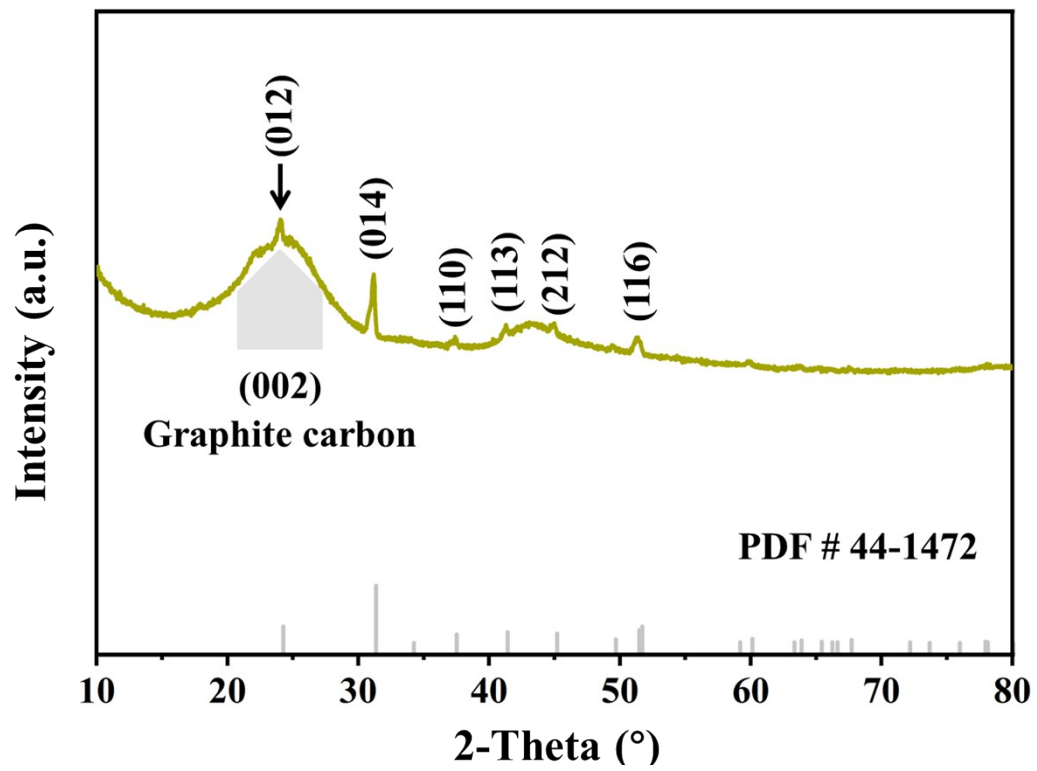

Fig. S1 XRD image of MnCO<sub>3</sub>/NC.

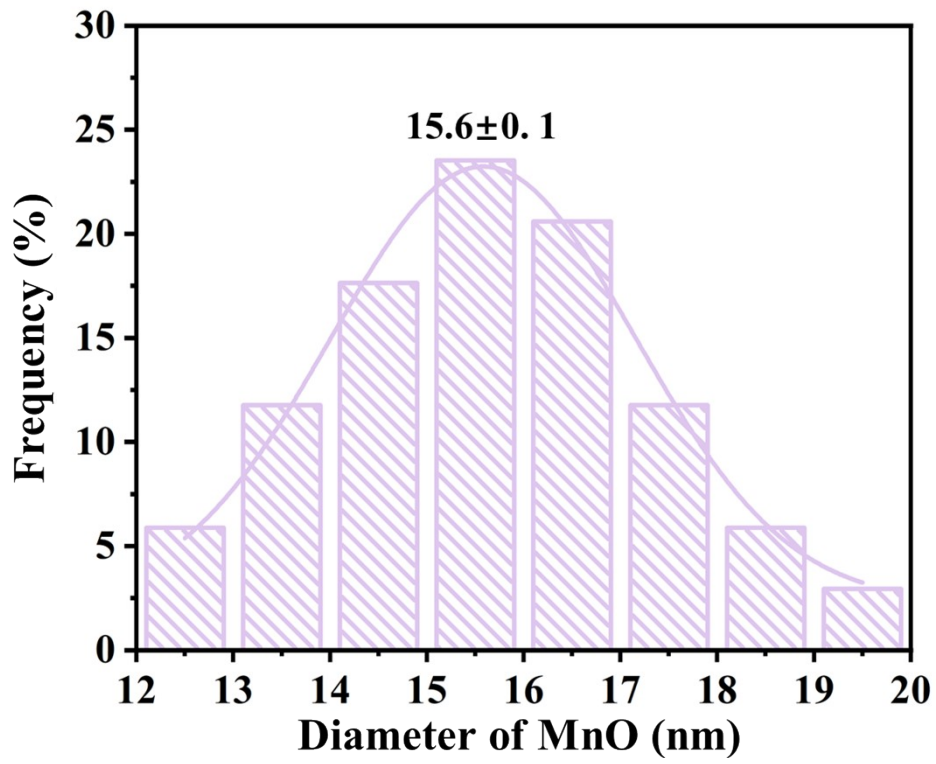

**Fig. S2** Particle-size distribution of MnO nanoparticles on the MnO/NC-900.

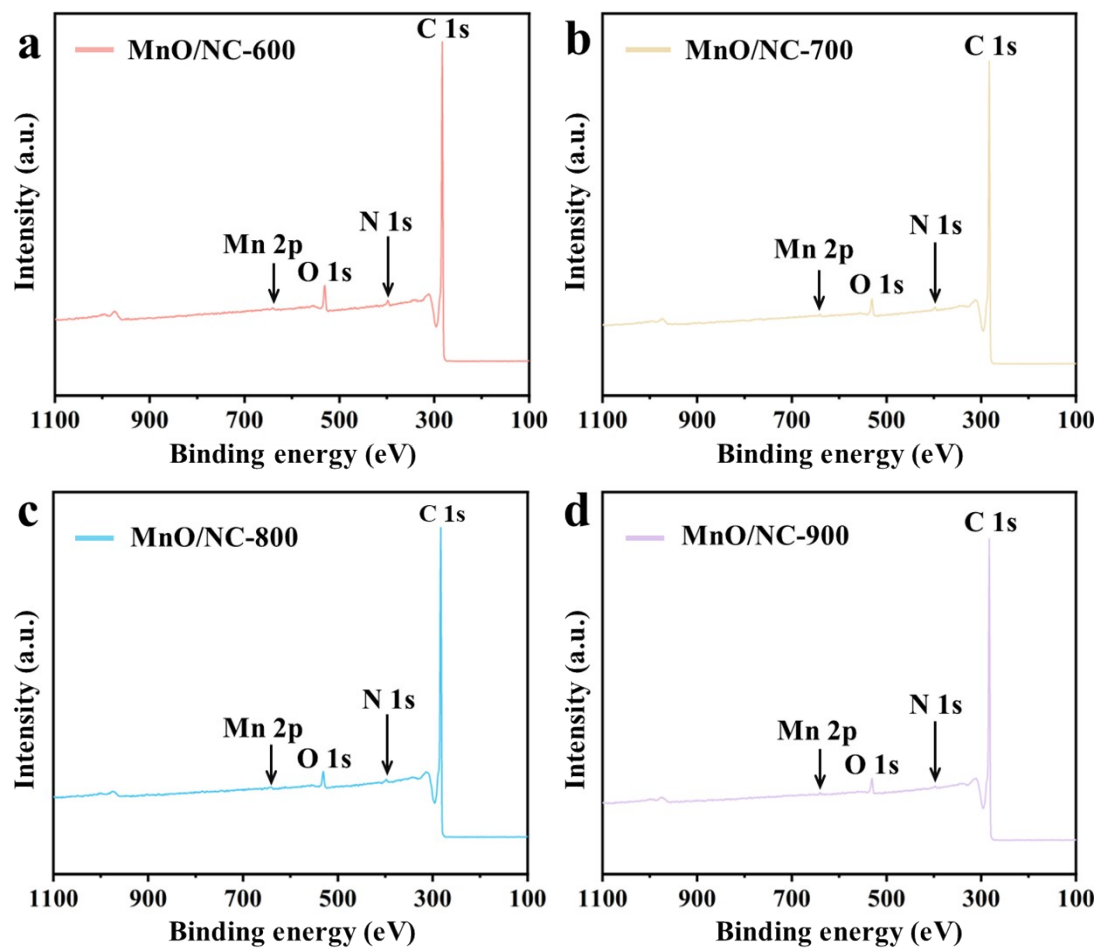

**Fig. S3** XPS survey spectra of (a) MnO/NC-600, (b) MnO/NC-700, (c) MnO/NC-800, and (d) MnO/NC-900.

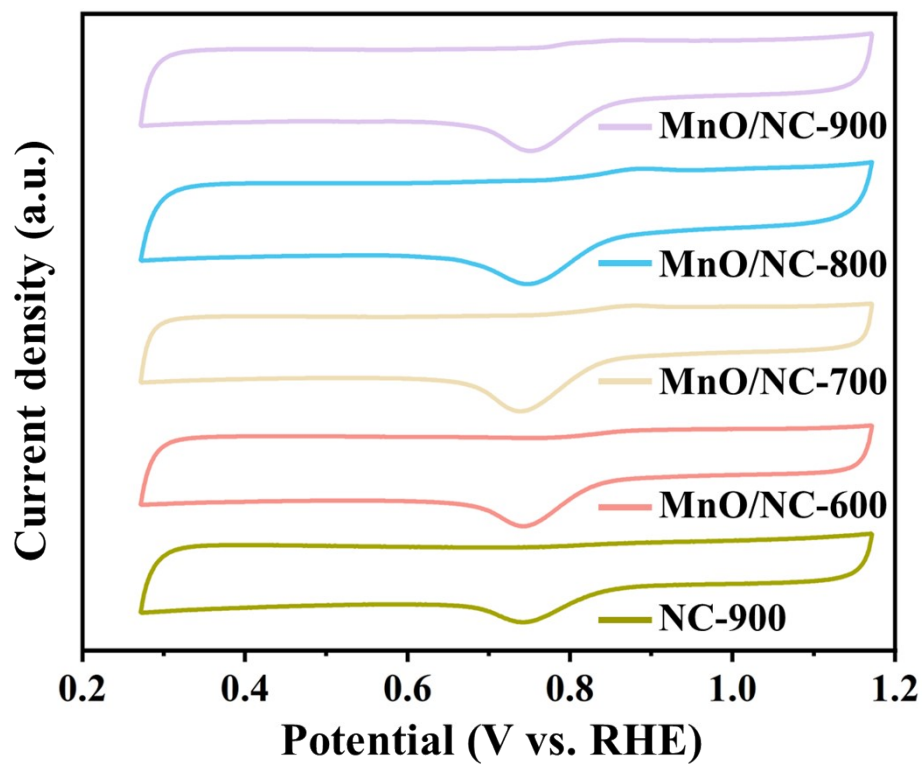

**Fig. S4** CV curves of MnO/NC-600, MnO/NC-700, MnO/NC-800, MnO/NC-900, and NC-900 in O<sub>2</sub>-saturated 0.1 M KOH electrolyte at a scan rate of 50 mV s<sup>-1</sup>.



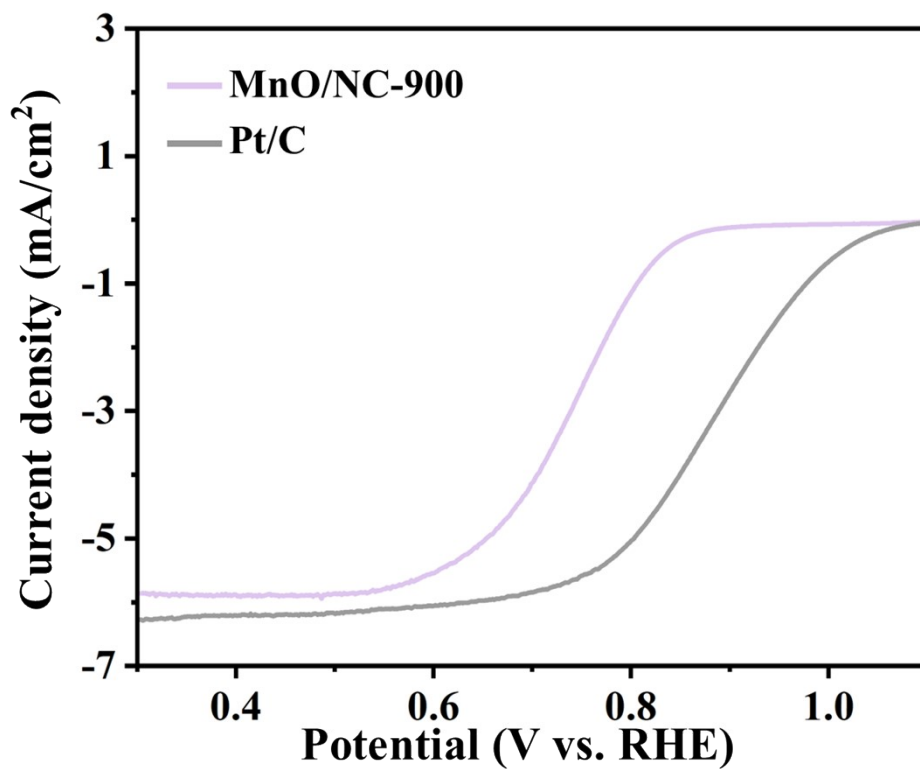

Fig. S5 LSV curves of MnO/NC-900 and Pt/C at 1600 rpm.

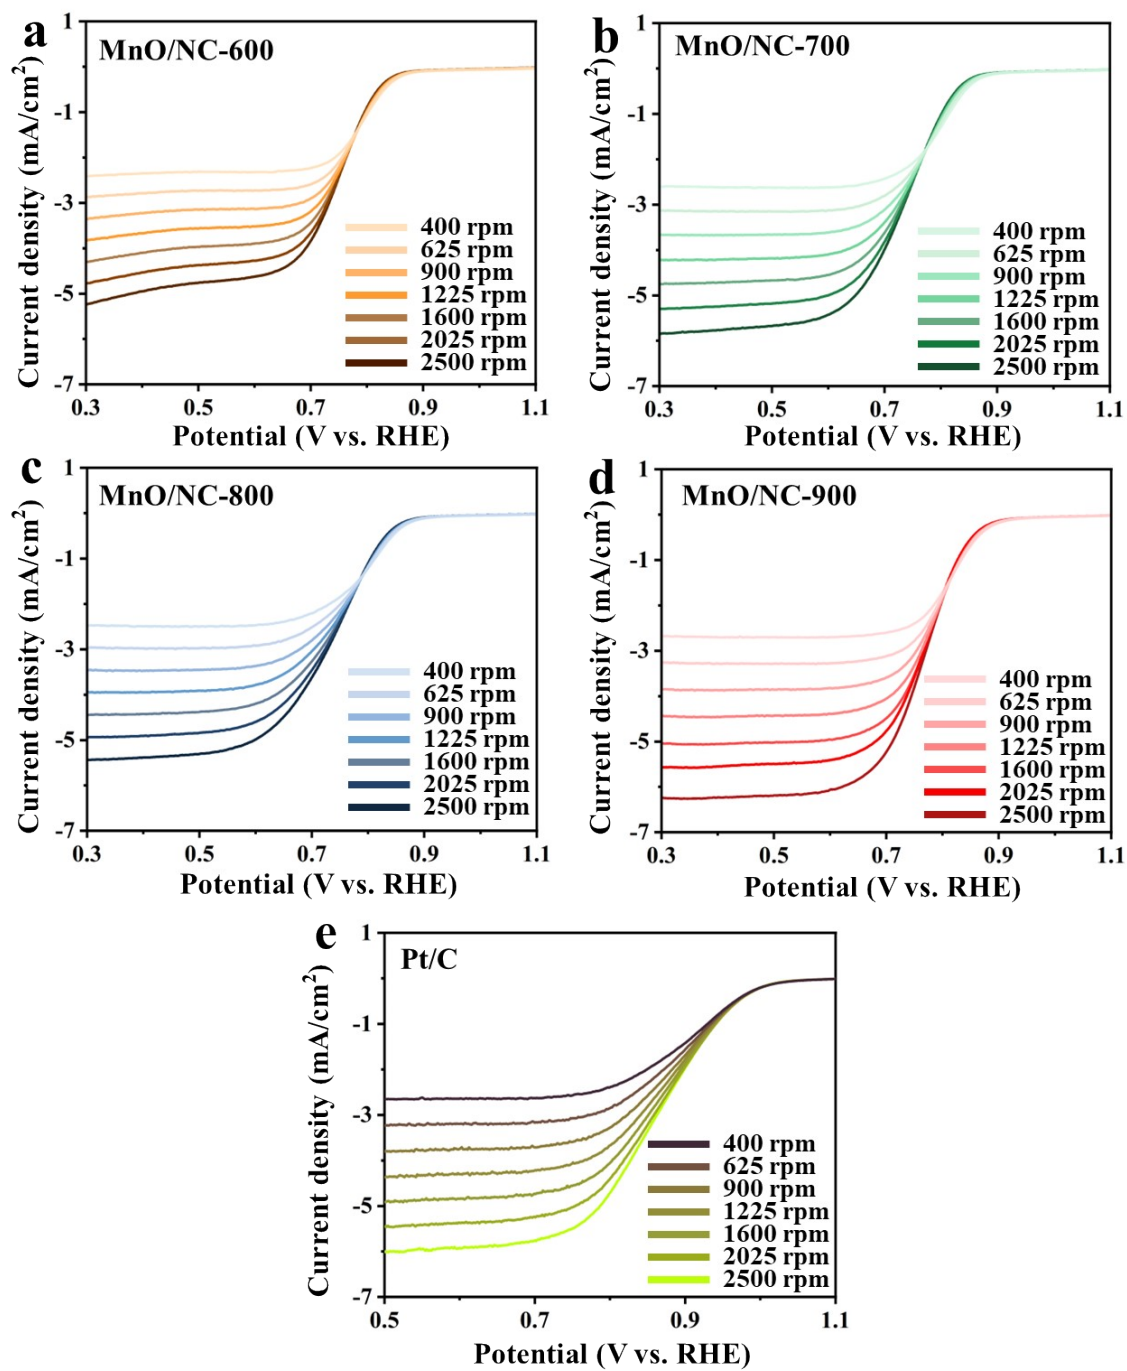

**Fig. S6** LSV curves of (a) MnO/NC-600, (b) MnO/NC-700, (c) MnO/NC-800, (d) MnO/NC-900, and (e) Pt/C with different rotation rates.

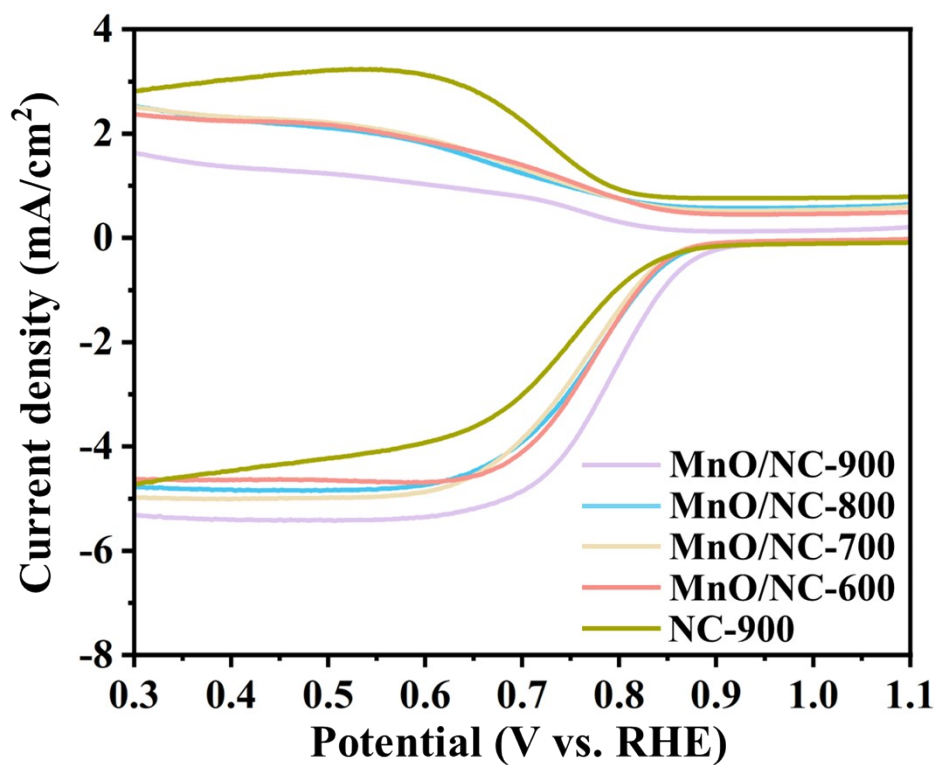

**Fig. S7** RRDE polarization curves of MnO/NC-600, MnO/NC-700, MnO/NC-800, MnO/NC-900, and NC-900 in O<sub>2</sub>-saturated 0.1 M KOH solution at a rotation rate of 1600 rpm.

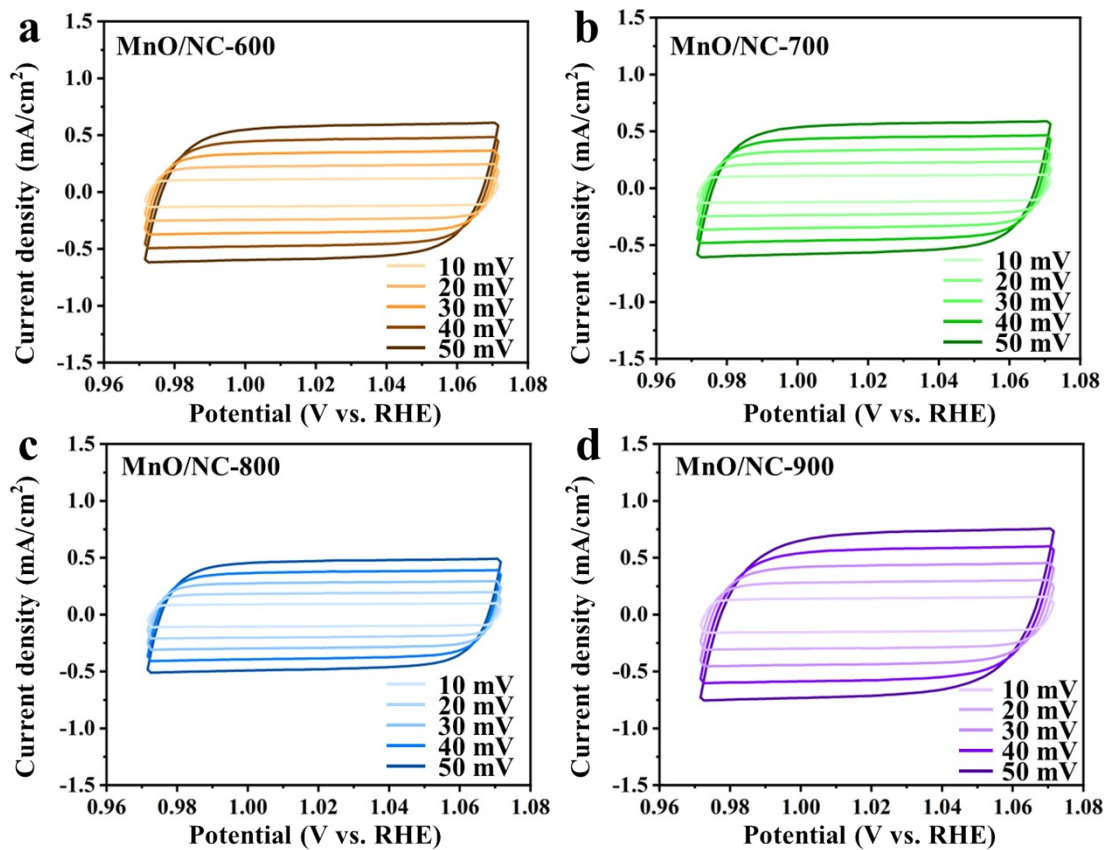

**Fig. S8** CV curves for ORR at various scan rates: (a) MnO/NC-600, (b) MnO/NC-700, (c) MnO/NC-800, and (d) MnO/NC-900.

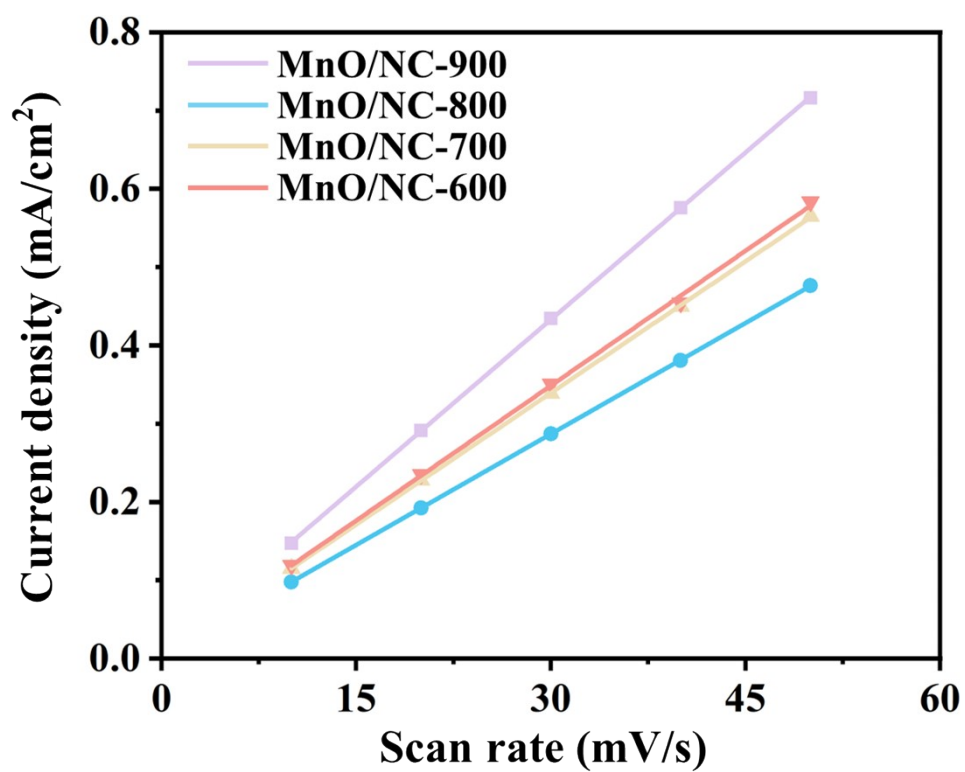

**Fig. S9** Current density to scanning rate of MnO/NC-600, MnO/NC-700, MnO/NC-800, and MnO/NC-900.

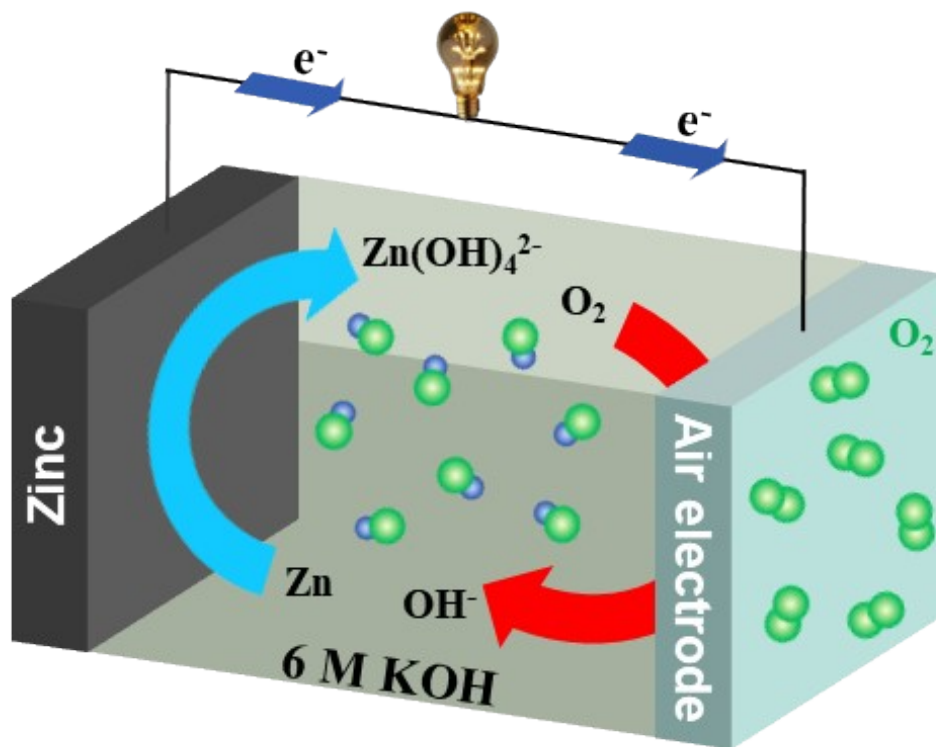

**Fig. S10** A schematic showing the aqueous ZAB configuration.

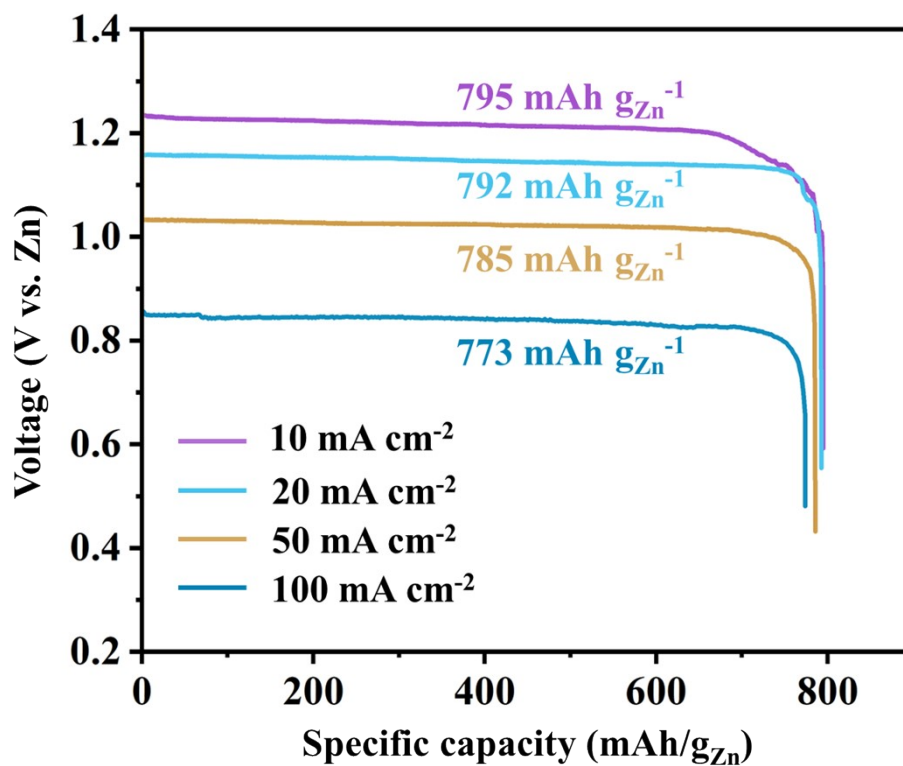

**Fig. S11** Discharge curves of MnO/NC-900-ZAB till complete Zn consumption at diverse current densities.

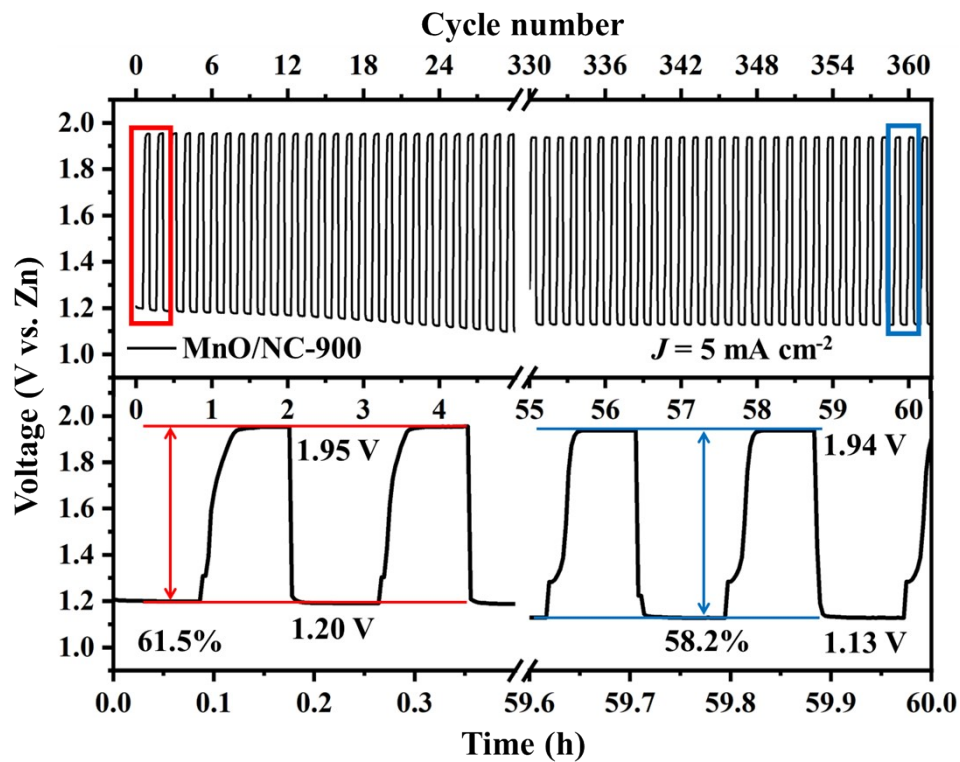

**Fig. S12** Galvanostatic charge-discharge cycling performance and corresponding voltage efficiency based on MnO/NC-900-ZAB at a current density of  $5 \text{ mA cm}^{-2}$ .



| Sample     | Mn   | C    | N    | O    |
|------------|------|------|------|------|
| MnO/NC-600 | 0.11 | 95.0 | 1.11 | 3.78 |
| MnO/NC-700 | 0.06 | 96.2 | 0.76 | 2.98 |
| MnO/NC-800 | 0.11 | 96.5 | 0.61 | 2.78 |
| MnO/NC-900 | 0.08 | 96.9 | 0.19 | 2.83 |

**Table S1.** Element contents in the MnO/NC samples measured by XPS.

**Table S2.** Relative proportions of pyridinic-N, pyrrolic-N, graphitic-N, and oxidized-N in the MnO/NC samples measured by XPS.

| Sample     | pyridinic-N | pyrrolic-N | graphitic-N | oxidized-N |
|------------|-------------|------------|-------------|------------|
| MnO/NC-600 | 30.5        | 44.4       | 9.40        | 15.7       |
| MnO/NC-700 | 32.7        | 41.2       | 13.2        | 12.9       |
| MnO/NC-800 | 35.0        | 35.8       | 13.9        | 15.3       |
| MnO/NC-900 | 37.2        | 30.1       | 18.7        | 14.0       |

**Table S3.** Relative proportions of  $O_{\alpha}$ ,  $O_{\beta}$ , and  $O_{\gamma}$  in the MnO/NC samples measured by XPS.

| Sample     | $O_{\alpha}$ | $O_{\beta}$ | $O_{\gamma}$ |
|------------|--------------|-------------|--------------|
| MnO/NC-600 | 43.2         | 38.2        | 18.6         |
| MnO/NC-700 | 35.9         | 47.6        | 16.5         |
| MnO/NC-800 | 39.8         | 48.2        | 12.0         |
| MnO/NC-900 | 34.7         | 49.0        | 16.3         |

**Table S4.** The ORR performance of reported Mn-based catalysts for comparison.

| <b>Catalysts</b>                           | <b><math>E_{1/2}</math> (V vs. RHE)</b> | <b>Reference s</b> |
|--------------------------------------------|-----------------------------------------|--------------------|
| MnO/NC-900                                 | 0.74                                    | This work          |
| MnO/RGO                                    | 0.60                                    | 1                  |
| MnO@CNT                                    | 0.70                                    | 2                  |
| MnO/N-CC-2                                 | 0.69                                    | 3                  |
| MnO/CC                                     | 0.72                                    | 4                  |
| MnO@NC-1100                                | 0.74                                    | 5                  |
| N-CN@MnO                                   | 0.69                                    | 6                  |
| MnO                                        | 0.63                                    | 7                  |
| NC/MnO <sub>2</sub> /NC (15)               | 0.73                                    | 8                  |
| Mn-defected Mn <sub>3</sub> O <sub>4</sub> | 0.65                                    | 9                  |
| H- $\beta$ -MnO <sub>2</sub>               | 0.69                                    | 10                 |
| Mn <sub>2</sub> O <sub>3</sub> nanoballs   | 0.68                                    | 11                 |
| $\gamma$ -MnO <sub>2</sub>                 | 0.66                                    | 12                 |
| MnO <sub>2</sub> nanoflakes                | 0.67                                    | 13                 |
| Cu- $\alpha$ -MnO <sub>2</sub> nanowires   | 0.71                                    | 14                 |
| $\lambda$ -MnO <sub>2</sub> -Z             | 0.67                                    | 15                 |

## References

- 1 Q. L. Wu, M. L. Jiang, X. F. Zhang, J. N. Cai and S. Lin, A novel octahedral MnO/RGO composite prepared by thermal decomposition as a noble-metal free electrocatalyst for ORR, *J. Mater. Sci.*, 2017, **52**, 6656-6669.
- 2 F. Li, T. T. Qin, Y. P. Sun, R. J. Jiang, J. F. Yuan, X. Q. Liu and A. P. O'Mullane, Preparation of a one-dimensional hierarchical MnO@CNT@Co-N/C ternary nanostructure as a high-performance bifunctional electrocatalyst for rechargeable Zn-air batteries, *J. Mater. Chem. A*, 2021, **9**, 22533-22543.
- 3 W. Hao, S-H. Lee and S. G. Peera, Xerogel-derived manganese oxide/N-doped carbon as a non-precious metal-based oxygen reduction reaction catalyst in microbial fuel cells for energy conversion applications, *Nanomaterials*, 2023, **13**, 2949.
- 4 Q. Liu, P. Z. Qiao, M. M. Tong, Y. Xie, X. X. Zhang, K. Lin, Z. J. Liang, L. Wang and H. G. Fu, Enhancing zinc-air battery performance by constructing three-dimensional N-doped carbon coating multiple valence Co and MnO heterostructures *Nano Res.*, 2024, **17**, 5104-5113.
- 5 L-Q. Ji, J. Yang, Z-Y. Zhang, Y. Qian, Z. Su, M. Han and H-K. Liu, Enhanced catalytic performance for oxygen reduction reaction erived from nitrogen-rich tetrazolate-based heterometallic metal-organic frameworks, *Cryst Growth Des*, 2019, **19**, 2991-2999.
- 6 M. G. Wang, F. Peng, M. Wang and J. Han, N-doped carbon nanospheres with nanocavities to encapsulate manganese oxides as ORR electrocatalysts, *New J. Chem.*, 2022, **44**, 14915-14921.
- 7 K. X. Lei, X. P. Han, Y. X. Hu, X. Liu, L. Cong, F. Y. Cheng and J. Chen, Chemical etching of manganese oxides for electrocatalytic oxygen reduction reaction, *Chem. Comm.*, 2015, **51**, 11599-11602.
- 8 Y. N. Li, S. Y. Cao, L. Fan, J. Han, M. G. Wang and R. Guo, Hybrid shells of MnO<sub>2</sub> nanosheets encapsulated by N-doped carbon towards nonprecious oxygen reduction reaction catalysts, *J. Colloid Interface Sci.*, 2018, **527**, 241-250.

- 9 Y-C. Zhang, S. Ullah, R. R. Zhang, L. Pan, X.W Zhang and J-J. Zoua, Manipulating electronic delocalization of  $\text{Mn}_3\text{O}_4$  by manganese defects for oxygen reduction reaction, *Appl Catal B-Environ*, 2020, **277**, 119247.
- 10 G. Cheng, P. Liu, S. H. Chen, Y. X. Wu, L. H. Huang, M. J. Chen, C. J. Hu, B. Lan, X. H. Su, M. Sun, and L. Yu, Self-templated formation of hierarchical hollow  $\beta\text{-MnO}_2$  microspheres with enhanced oxygen reduction activities, *Colloid Surface A*, 2022, **637**, 128228.
- 11 S. Ghosh, P. Kar, N. Bhandary, S. Basu, S. Sardar, T. Maiyalagan, D. Majumdar, S. K. Bhattacharya, A. Bhaumik, P. Lemmens and S. K. Pal, Microwave-assisted synthesis of porous  $\text{Mn}_2\text{O}_3$  nanoballs as bifunctional electrocatalyst for oxygen reduction and evolution reaction, *Catal. Sci. Technol.*, 2016, **6**, 1417-1429.
- 12 B. Zhang, G. Cheng, B. Lan, X. Zheng, M. Sun, F. Ye, L. Yu and X. Cheng, Crystallization design of  $\text{MnO}_2$  via acid towards better oxygen reduction activity, *CrystEngComm*, 2016, **18**, 6895-6902.
- 13 C. Wei, L. Yu, C. Cui, J. Lin, C. Wei, N. Mathews, F. Huo, T. Sritharan and Z. Xu, Ultrathin  $\text{MnO}_2$  nanoflakes as efficient catalysts for oxygen reduction reaction, *Chem. Commun.*, 2014, **50**, 7885-7888.
- 14 D. J. Davis, T. N. Lambert, J. A. Vigil, M. A. Rodriguez, M. T. Brumbach, E. N. Coker and S. J. Limmer, Role of Cu-ion doping in  $\text{Cu-}\alpha\text{-MnO}_2$  nanowire electrocatalysts for the oxygen reduction reaction, *J. Phys. Chem. C*, 2014, **118**, 17342-17350.
- 15 S. Lee, G. Nam, J. Sun, J.-S. Lee, H.-W. Lee, W. Chen, J. Cho and Y. Cui, Enhanced intrinsic catalytic activity of  $\lambda\text{-MnO}_2$  by electrochemical tuning and oxygen vacancy generation, *Angew. Chem. Int. Ed.*, 2016, **55**, 8599-8604.
